# Supplementary material
Source: PubMed Central journal article supplement (PMC2957290)
Supplement: NIHMS242666-supplement-Supplementary_Table.pdf [file NIHMS242666-supplement-Supplementary_Table.pdf]

**Table S1. Quantification of IPC patterning defects from *dpp*<sup>e90</sup> mutant retinas**

|                                                                                                                                                                                                                                                                                                                                                                                                                                | % Defects |
|--------------------------------------------------------------------------------------------------------------------------------------------------------------------------------------------------------------------------------------------------------------------------------------------------------------------------------------------------------------------------------------------------------------------------------|-----------|
| <b><i>dpp</i><sup>e90</sup> at 18°C</b>                                                                                                                                                                                                                                                                                                                                                                                        |           |
| Abnormal IPC:IPC contacts                                                                                                                                                                                                                                                                                                                                                                                                      | 1         |
| Failure in 3°s positioning                                                                                                                                                                                                                                                                                                                                                                                                     | 2         |
| Abnormal 2°/3°s arrangement                                                                                                                                                                                                                                                                                                                                                                                                    | 1         |
| Misplaced bristles                                                                                                                                                                                                                                                                                                                                                                                                             | 2         |
| <b><i>dpp</i><sup>e90</sup> at 25°C</b>                                                                                                                                                                                                                                                                                                                                                                                        |           |
| Abnormal IPC:IPC contacts                                                                                                                                                                                                                                                                                                                                                                                                      | 19        |
| Failure in 3°s positioning                                                                                                                                                                                                                                                                                                                                                                                                     | 13        |
| Abnormal 2°/3°s arrangements                                                                                                                                                                                                                                                                                                                                                                                                   | 13        |
| Misplaced bristles                                                                                                                                                                                                                                                                                                                                                                                                             | 8         |
| Quantification of IPC patterning defects from retinas of animals carrying the temperature-sensitive allele <i>dpp</i> <sup>e90</sup> and raised at the permissive (18°C), or non-permissive (25°C), temperature. The data are expressed as the percentage of ommatidia with defects out of the total number of ommatidia counted; 18°C, <i>n</i> =239 ommatidia from 8 animals; 25°C, <i>n</i> =433 ommatidia from 14 animals. |           |
