# Supplementary material
Source: PubMed Central journal article supplement (PMC2957290)

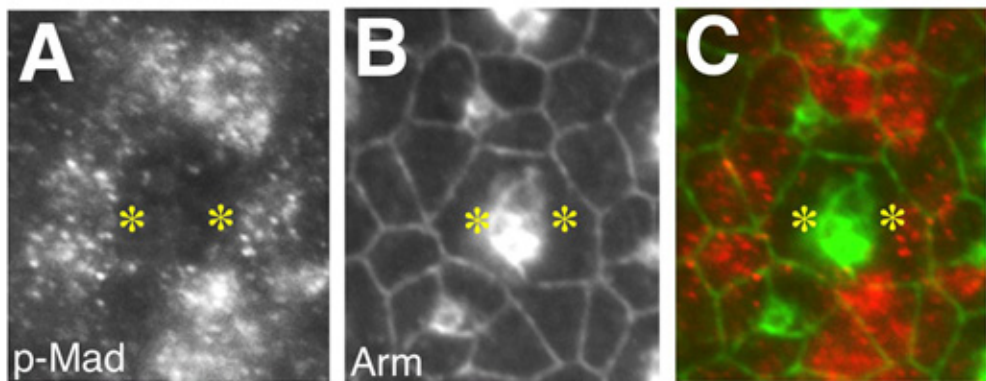

24 hrs  
(cone cells)

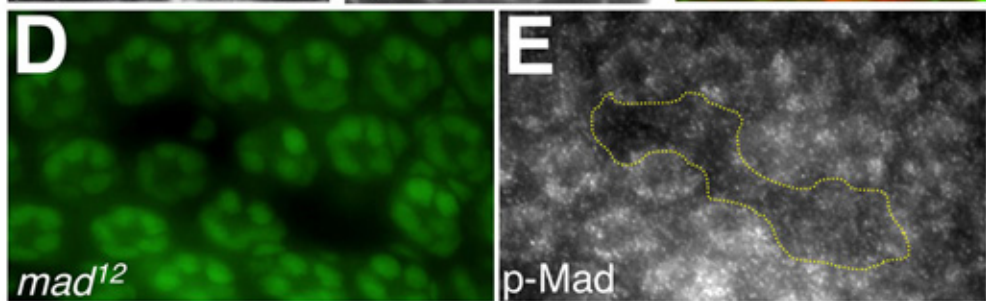

24 hrs  
(IPCs)

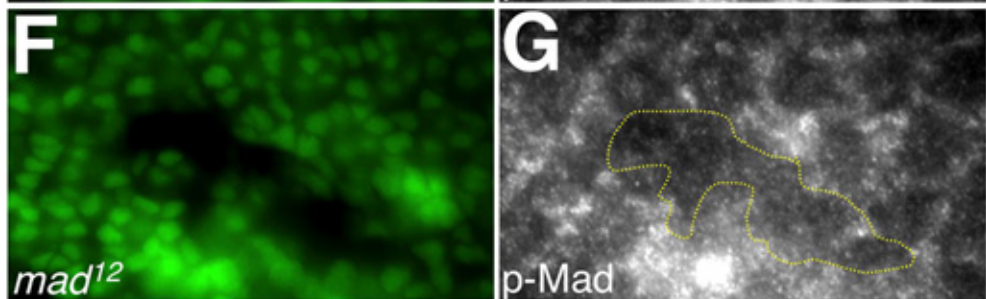

31 hrs  
(IPCs)

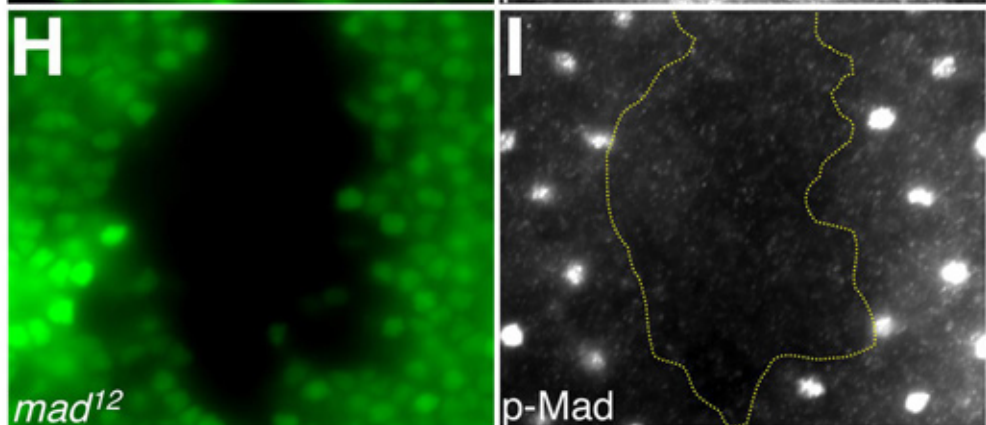

Supplement: NIHMS242666-supplement-Supplementary_Figure_1.pdf [file NIHMS242666-supplement-Supplementary_Figure_1.pdf]

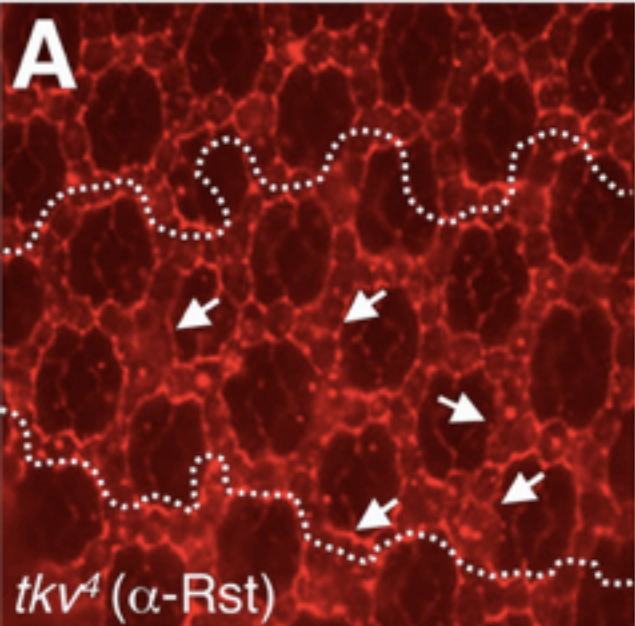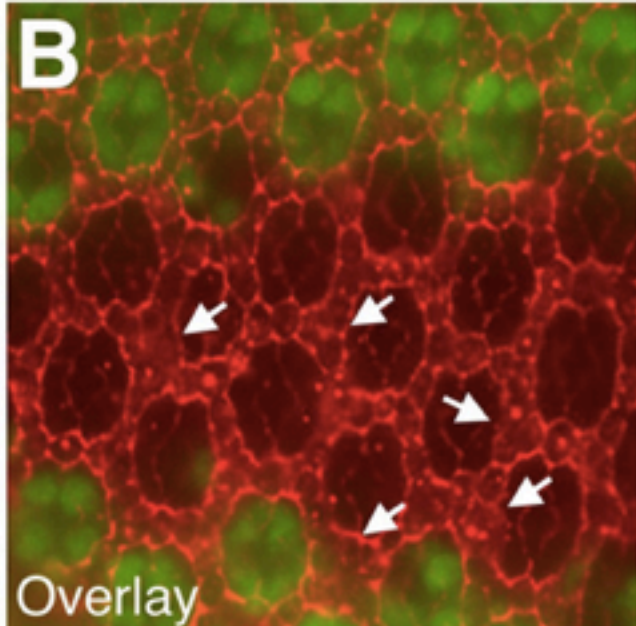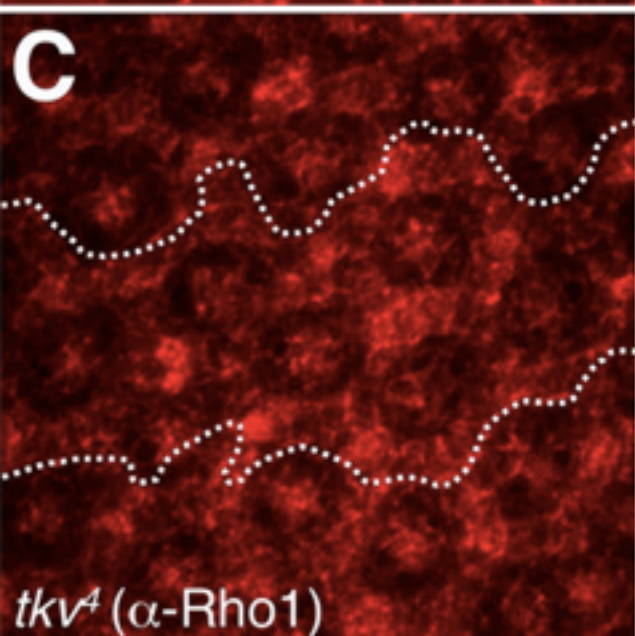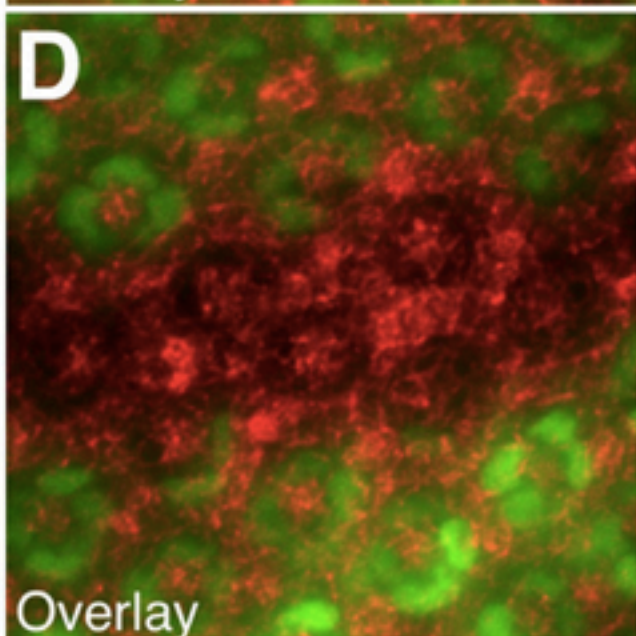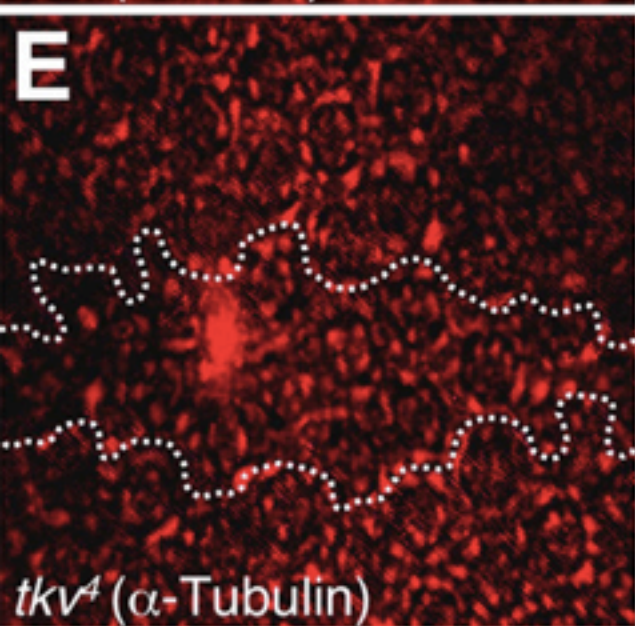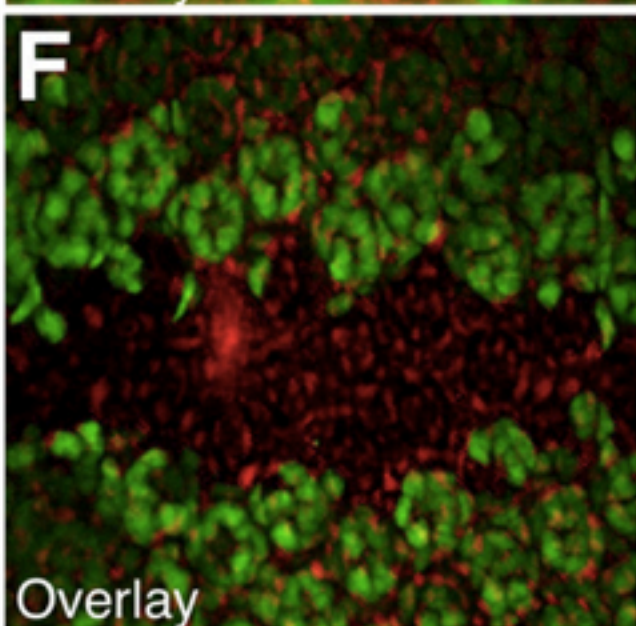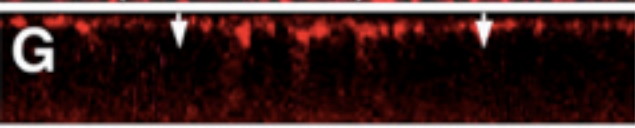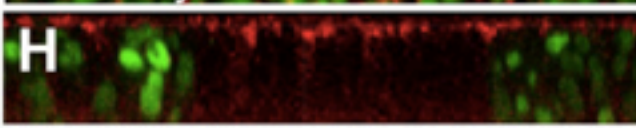

Supplement: NIHMS242666-supplement-Supplementary_Figure_2.pdf [file NIHMS242666-supplement-Supplementary_Figure_2.pdf]
